# Supplementary material
Source: PubMed Central journal article supplement (PMC5007150)

# Supplementary Figure 1. DBS Electrode Location Confirmation

A. ATN Location (pig atlas)

B. Post-op CT

C. CT-MR Fusion

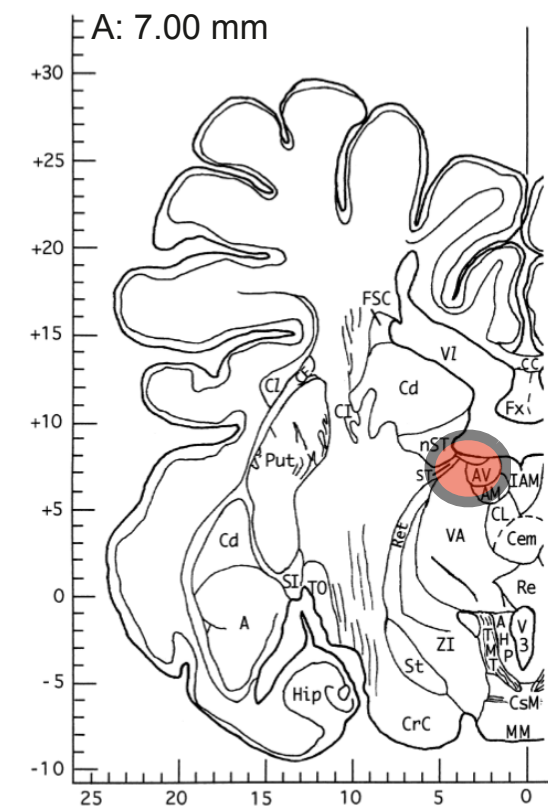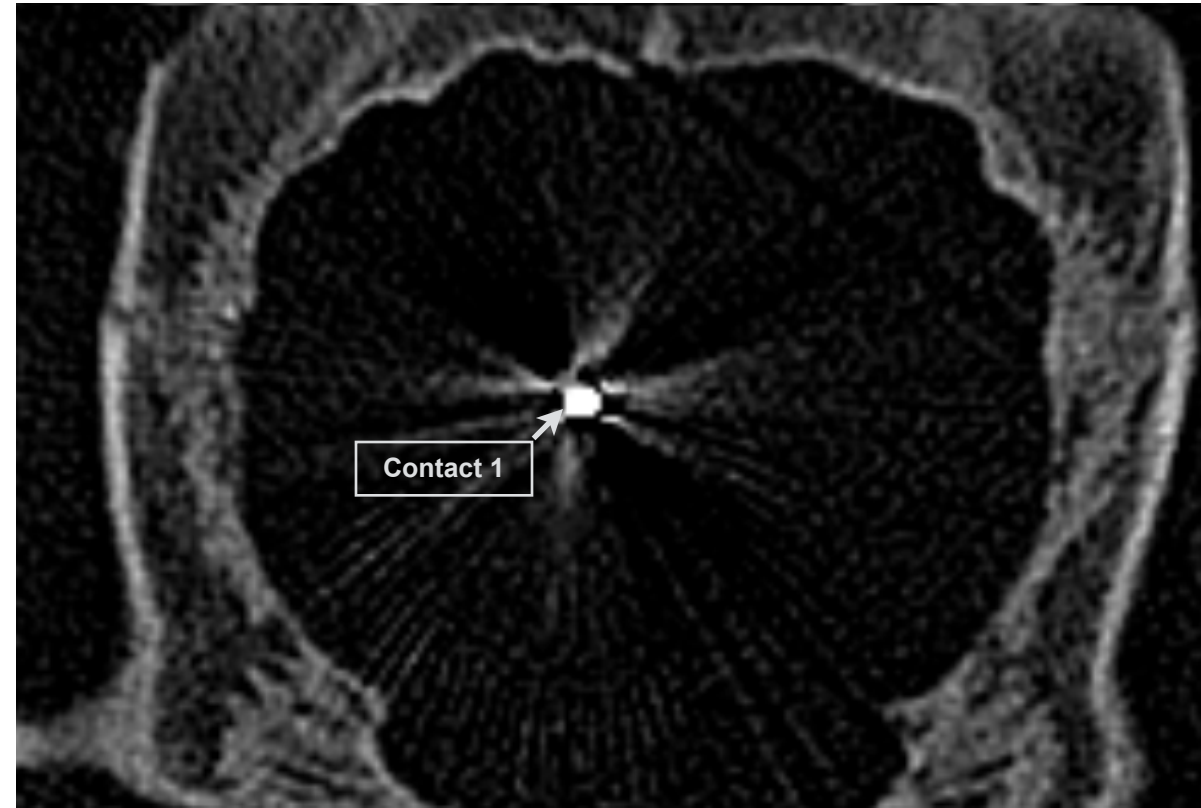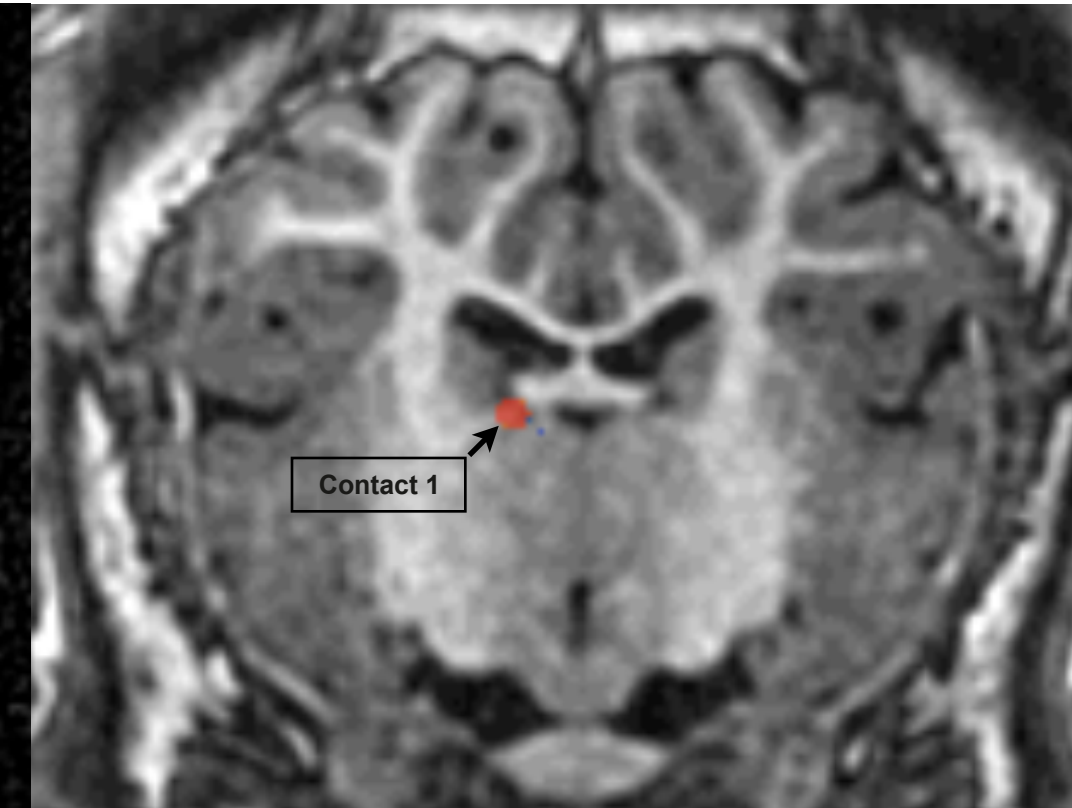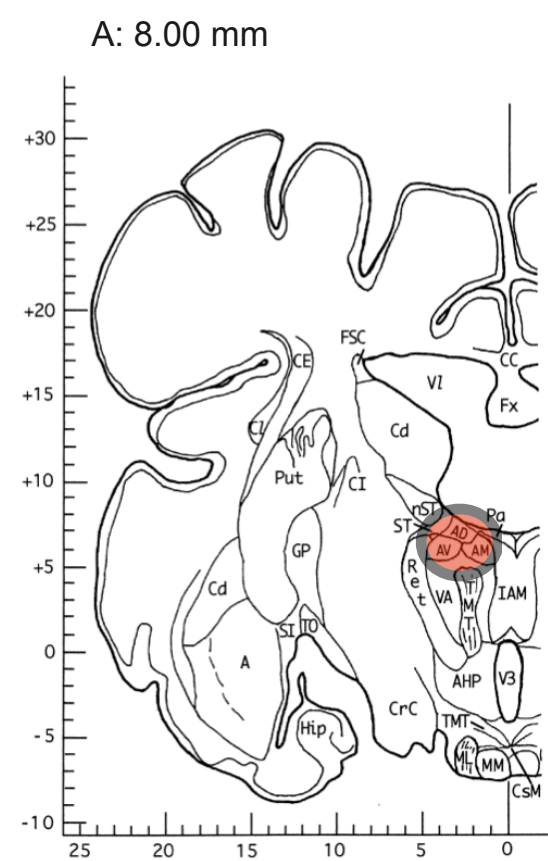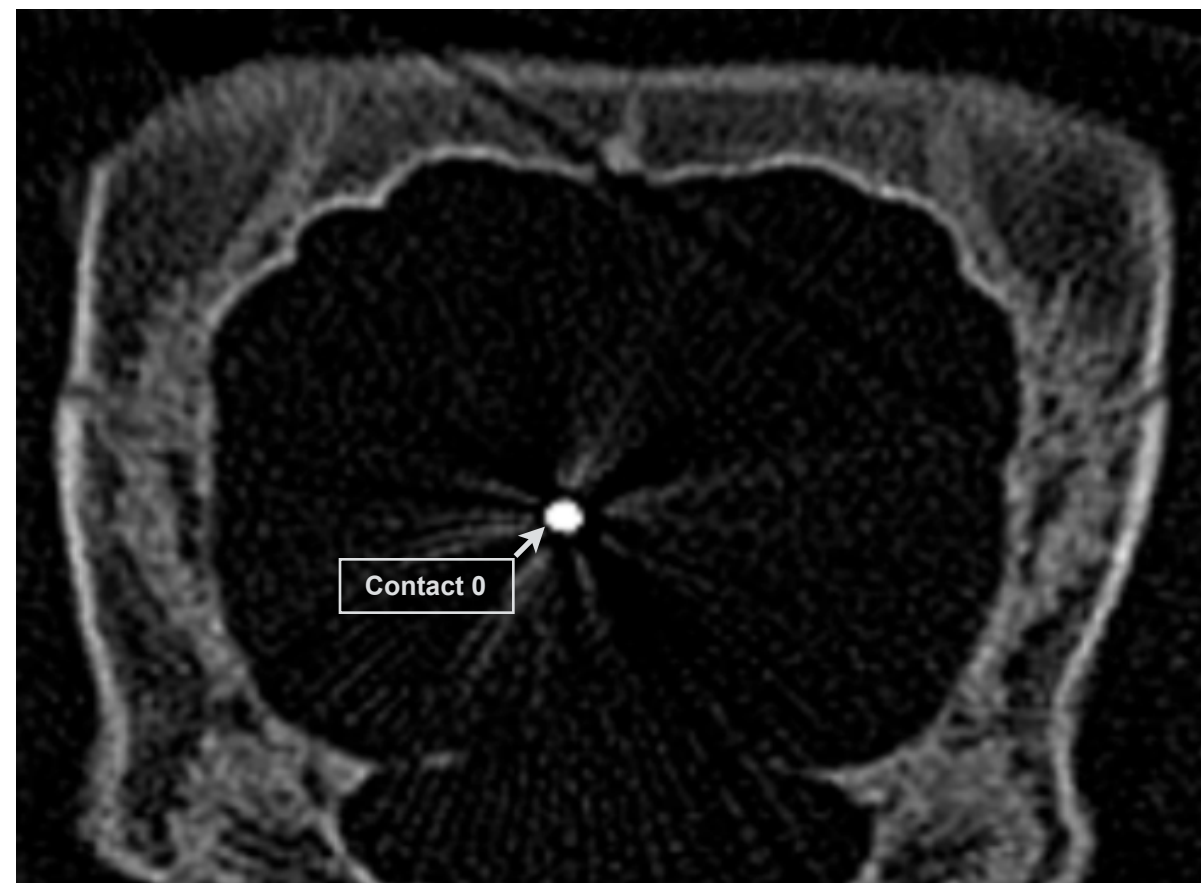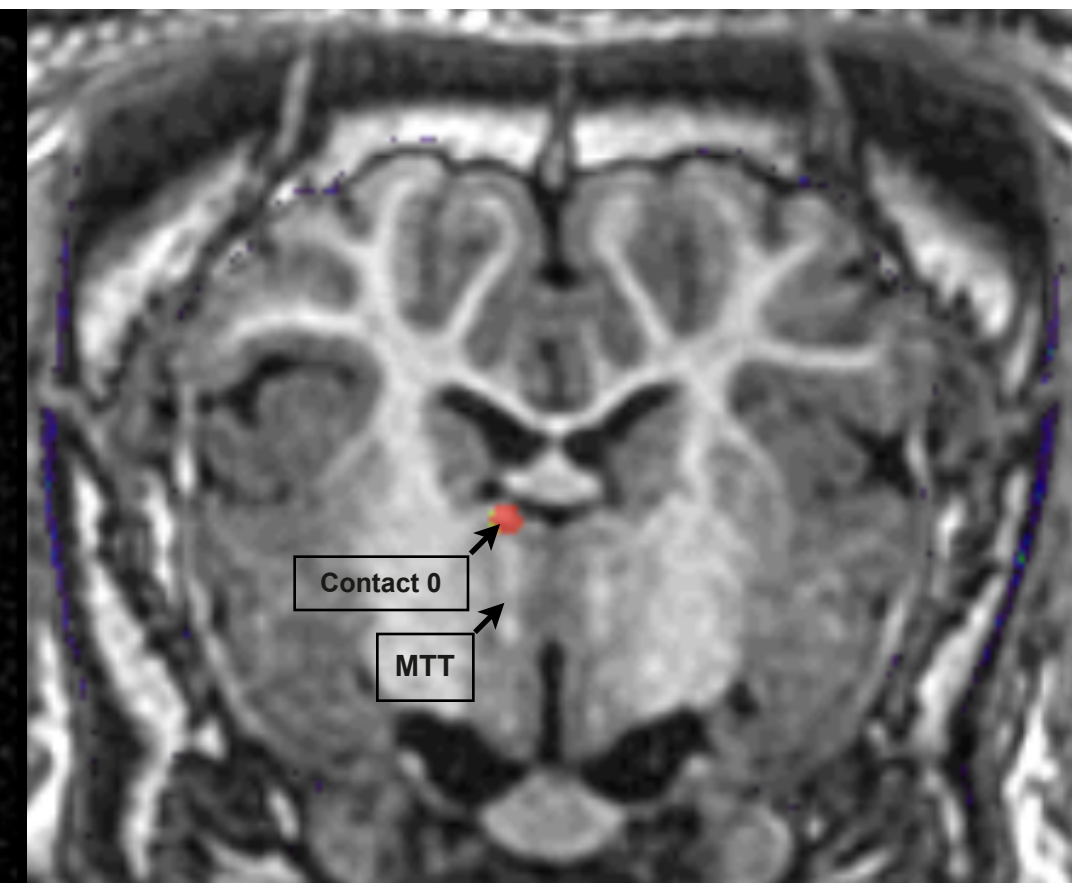

Supplementary Figure 2. BOLD Signal Evoked by ATN DBS ((145Hz 90 $\mu$ s 5V) - SANTE Temporal Paradigm (1 min ON; 5 min OFF)

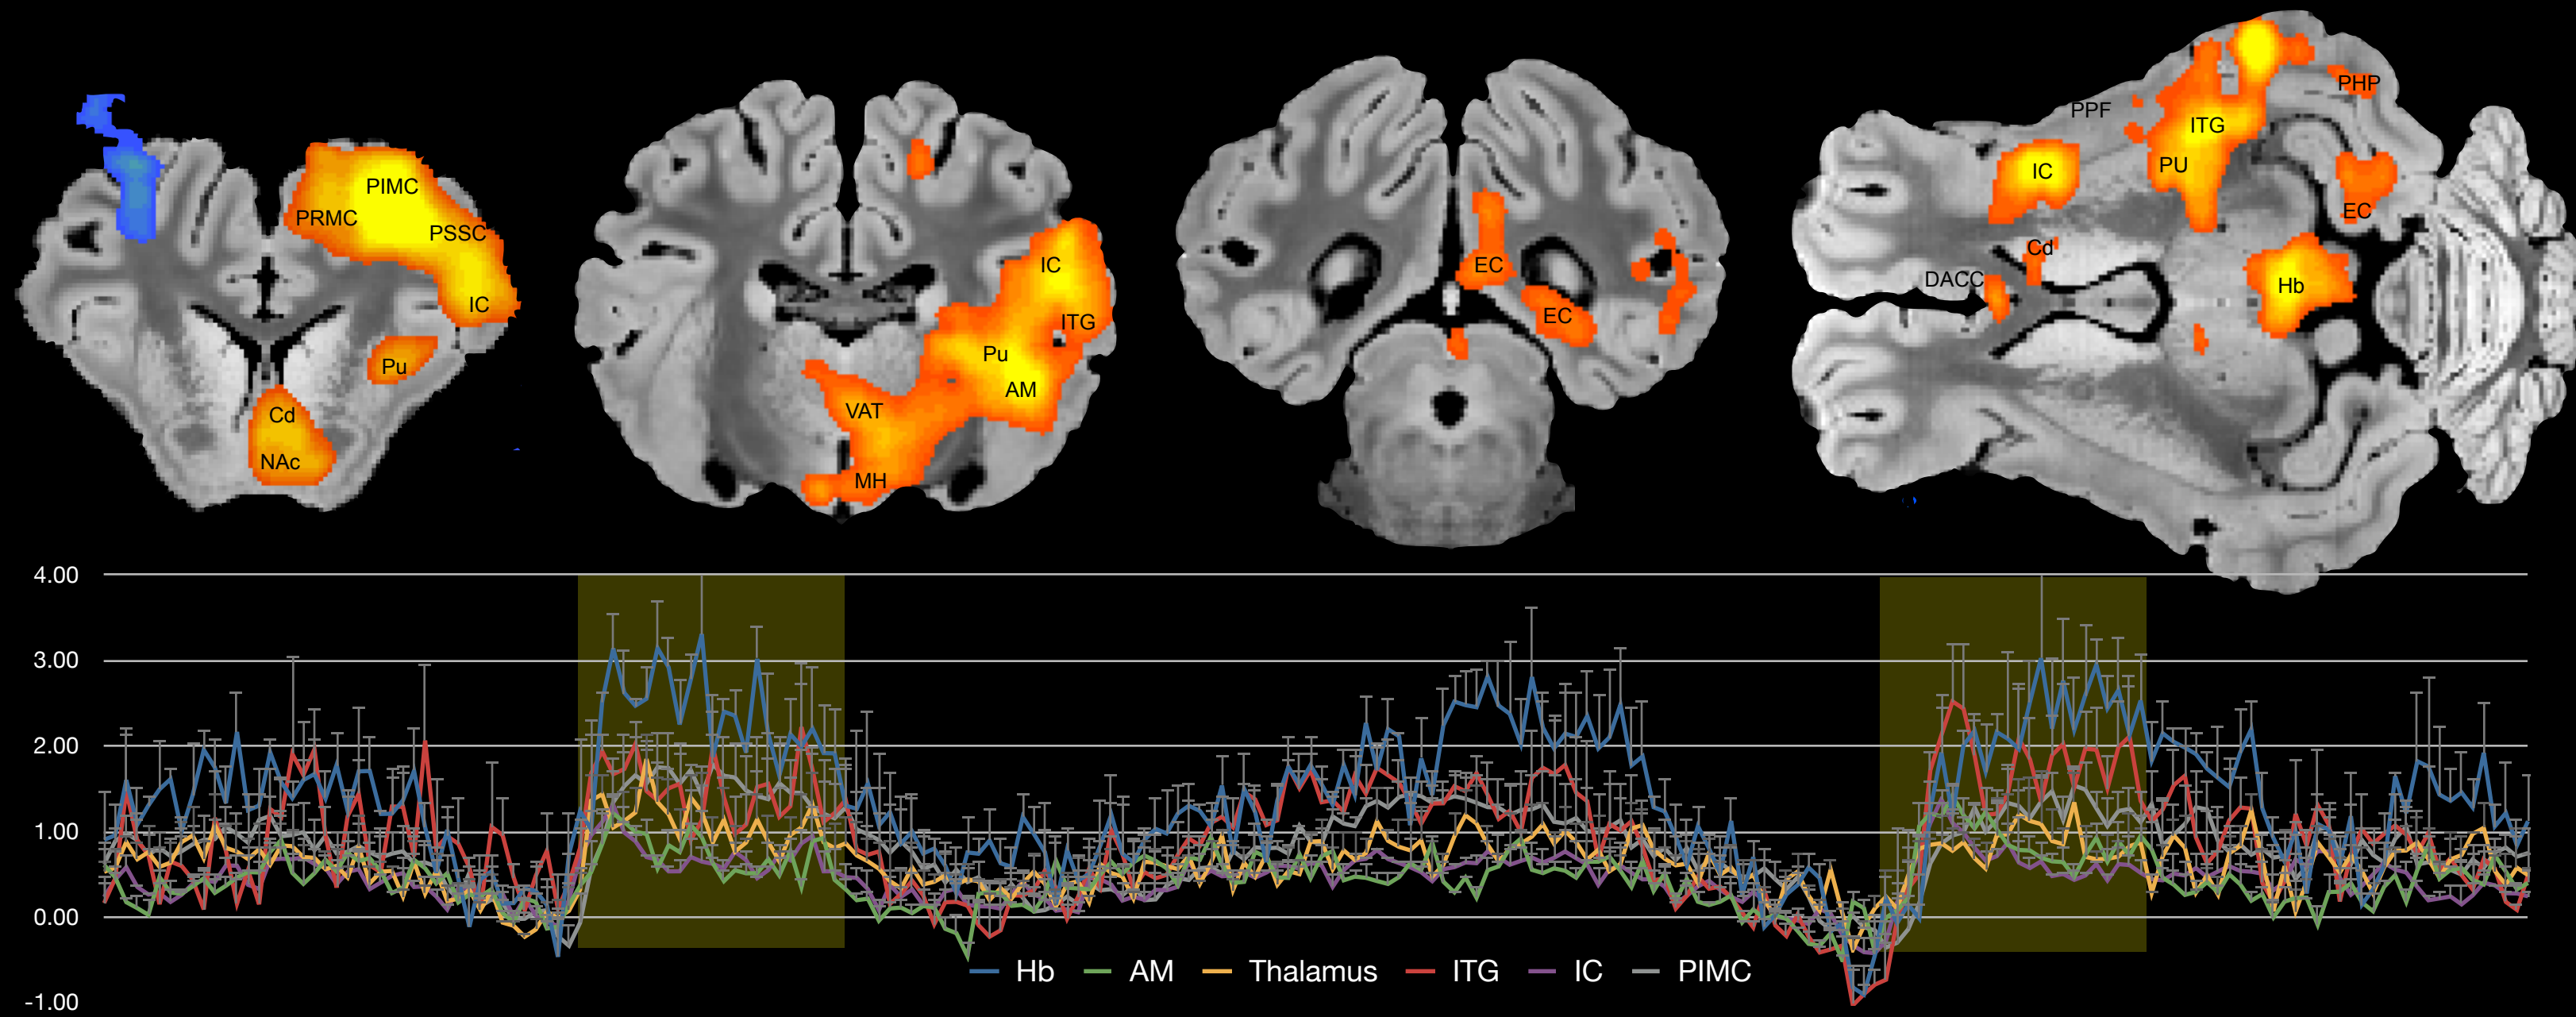

Supplement: NIHMS784745-supplement-1.pdf [file NIHMS784745-supplement-1.pdf]
